# Supplementary material for: Safety and efficacy of the miR-124 upregulator ABX464 (obefazimod, 50 and 100 mg per day) in patients with active rheumatoid arthritis and inadequate response to methotrexate and/or anti-TNFα therapy: a placebo-controlled phase II study
Source: PubMed Central journal article supplement — Ann Rheum Dis. 2022 May 31;81(8):1076–84. doi: 10.1136/annrheumdis-2022-222228 (PMC9279835; doi:10.1136/annrheumdis-2022-222228), 2022-05-31
Supplement: annrheumdis-2022-222228supp001.pdf [file annrheumdis-2022-222228supp001.pdf]

**Supplementary Table 1:** Summary of all adverse events (Safety set\*)

|                                                 | <b>ABX464<br/>100mg<br/>(N=19)</b> | <b>ABX464 50mg<br/>(N=21)</b> | <b>Placebo<br/>(N=20)</b> | <b>Total<br/>(N=60)</b> |
|-------------------------------------------------|------------------------------------|-------------------------------|---------------------------|-------------------------|
|                                                 | n<br>N (%)                         | n<br>N (%)                    | n<br>N (%)                | n<br>N (%)              |
| Any Adverse Event                               | 97<br>18 (94.7%)                   | 85<br>18 (85.7%)              | 38<br>14 (70.0%)          | 220<br>50 (83.3%)       |
| Any Treatment-Emergent Adverse Event            | 94<br>18 (94.7%)                   | 79<br>18 (85.7%)              | 38<br>14 (70.0%)          | 211<br>50 (83.3%)       |
| Chi-squared test, ABX464 vs. placebo<br>p-value | 0.035                              | 0.221                         |                           |                         |
| Any Serious Adverse Event                       | 1<br>1 (5.3%)                      | 1<br>1 (4.8%)                 | 1<br>1 (5.0%)             | 3<br>3 (5.0%)           |
| Adverse Event leading to death                  | 0                                  | 0                             | 0                         | 0                       |
| Any grade 3 or higher Adverse Event             | 4<br>3 (15.8%)                     | 3<br>3 (14.3%)                | 1<br>1 (5.0%)             | 8<br>7 (11.7%)          |
| Atrial fibrillation                             | 1 (5.3%)                           | 0                             | 0                         | 1 (1.7%)                |
| Abdominal pain upper                            | 1 (5.3%)                           | 0                             | 0                         | 1 (1.7%)                |
| Diarrhoea                                       | 1 (5.3%)                           | 0                             | 0                         | 1 (1.7%)                |
| COVID-19                                        | 0                                  | 0                             | 1 (5.0%)                  | 1 (1.7%)                |
| Disturbance in attention                        | 0                                  | 1 (4.8%)                      | 0                         | 1 (1.7%)                |
| Headache                                        | 1 (5.3%)                           | 0                             | 0                         | 1 (1.7%)                |
| Organic brain syndrome                          | 0                                  | 1 (4.8%)                      | 0                         | 1 (1.7%)                |

N (%): number and percentage of patients ; n: number of events. The denominator for each percentage is the number of patients within the column. Treatment emergent adverse event rate for ABX464 vs placebo is compared using likelihood ratio chi-square test at a two-sided 10% significance level.

\*: the safety set corresponded to included patients who had received at least one dose of the study treatment.

**Supplementary Table 2:** TEAEs leading to drug discontinuation, by SOC and Preferred Term (Safety set)

|                                                           | ABX464 100mg<br>(N=19) |           | ABX464 50mg<br>(N=21) |          | Placebo<br>(N=20) |          |
|-----------------------------------------------------------|------------------------|-----------|-----------------------|----------|-------------------|----------|
|                                                           | n                      | N (%)     | n                     | N (%)    | n                 | N (%)    |
| Number of patients withdrawn for AEs                      | 9                      |           | 1                     |          | 1                 |          |
| Any TEAEs Leading to permanent Study Drug Discontinuation | 17                     | 9 (47.4%) | 1                     | 1 (4.8%) | 1                 | 1 (5.0%) |
| Cardiac disorders                                         | 1                      | 1 (5.3%)  | 0                     | 0        | 0                 | 0        |
| Atrial fibrillation                                       | 1                      | 1 (5.3%)  | 0                     | 0        | 0                 | 0        |
| Gastrointestinal disorders                                | 11                     | 9 (47.4%) | 1                     | 1 (4.8%) | 0                 | 0        |
| Abdominal pain                                            | 1                      | 1 (5.3%)  | 0                     | 0        | 0                 | 0        |
| Abdominal pain upper                                      | 2                      | 2 (10.5%) | 1                     | 1 (4.8%) | 0                 | 0        |
| Diarrhoea                                                 | 3                      | 3 (15.8%) | 0                     | 0        | 0                 | 0        |
| Nausea                                                    | 4                      | 4 (21.1%) | 0                     | 0        | 0                 | 0        |
| Vomiting                                                  | 1                      | 1 (5.3%)  | 0                     | 0        | 0                 | 0        |
| Infections and infestations                               | 0                      | 0         | 0                     | 0        | 1                 | 1 (5.0%) |
| COVID-19                                                  | 0                      | 0         | 0                     | 0        | 1                 | 1 (5.0%) |
| Musculoskeletal and connective tissue disorders           | 1                      | 1 (5.3%)  | 0                     | 0        | 0                 | 0        |
| Arthralgia                                                | 1                      | 1 (5.3%)  | 0                     | 0        | 0                 | 0        |
| Nervous system disorders                                  | 4                      | 4 (21.1%) | 0                     | 0        | 0                 | 0        |
| Headache                                                  | 4                      | 4 (21.1%) | 0                     | 0        | 0                 | 0        |

n: number of events; N(%): number and percentage of patients. The denominator for each percentage is the number of patients within the column. Duration (days) represents median duration of AEs (from baseline to occurrence). AE = adverse event; SOC: system organ class.

\*: the safety set corresponded to included patients who had received at least one dose of the study treatment.

**Supplementary Table 3:** Haematology and biochemistry median changes (and min-max values) from baseline to week 12 (Safety set)

|                                         |   | ABX464 100mg              | ABX464 50mg                | Placebo                    |
|-----------------------------------------|---|---------------------------|----------------------------|----------------------------|
| <b>Haematology</b>                      |   |                           |                            |                            |
| ESR (mm/h)                              | n | 7<br>-1.0 (-22 ; 18)      | 16<br>-5.0 (-37; 49)       | 18<br>-2.5 (-38; 41)       |
| Hemoglobin (g/L)                        | n | 7<br>5.0 (0; 13)          | 18<br>-1.0 (-17; 16)       | 19<br>-1.0 (-11; 11)       |
| White blood cells (x10 <sup>9</sup> /L) | n | 7<br>0.90 (-1.5; 3.3)     | 18<br>1.35 (-2.1; 5.1)     | 19<br>-0.40 (-3.2; 4.8)    |
| Neutrophils (x10 <sup>9</sup> /L)       | n | 7<br>0.700 (-1.81; 2.66)  | 18<br>0.864 (-2.40; 5.40)  | 19<br>-0.140 (-2.29; 4.62) |
| Lymphocytes (x10 <sup>9</sup> /L)       | n | 7<br>0.030 (-1.77; 0.61)  | 18<br>0.435 (-0.28; 1.12)  | 19<br>-0.007 (-0.77; 0.93) |
| Monocytes (x10 <sup>9</sup> /L)         | n | 7<br>0.220 (-0.27; 0.28)  | 18<br>0.188 (-0.10; 0.41)  | 19<br>-0.030 (-0.20; 0.21) |
| Eosinophils (x10 <sup>9</sup> /L)       | n | 7<br>0.000 (-0.09; 0.20)  | 18<br>0.035 (-0.18; 0.23)  | 19<br>-0.010 (-0.20; 0.15) |
| Basophils (x10 <sup>9</sup> /L)         | n | 7<br>-0.010 (-0.05; 0.05) | 18<br>0.009 (-0.04; 0.04)  | 19<br>0.000 (-0.04; 0.12)  |
| Platelet Count (x10 <sup>9</sup> /L)    | n | 7<br>-64.0 (-429; -28)    | 18<br>-18.5 (-121; 379)    | 19<br>-8.0 (-149; 35)      |
| Fibrinogen (g/L)                        | n | 7<br>0.571 (-0.29; 1.44)  | 15<br>0.520 (-2.07; 2.22)  | 15<br>-0.035 (-1.68; 1.26) |
| <b>Biochemistry</b>                     |   |                           |                            |                            |
| CRP (mg/L)                              | n | 7<br>0.00 (-8.8; 13.4)    | 18<br>-3.60 (-54.9; 87.5)  | 19<br>-1.70 (-36.3; 65.5)  |
| Creatinine (μmol/L)                     | n | 7<br>0.00 (-10.6; 22.1)   | 18<br>-0.44 (-20.3; 12.0)  | 18<br>0.00 (-48.6; 9.7)    |
| Aspartate Aminotransferase (U/L)        | n | 7<br>5.00 (-1.3; 14.0)    | 18<br>-0.05 (-30; 9.0)     | 19<br>1.00 (-15.0; 18.5)   |
| Alanine Aminotransferase (U/L)          | n | 7<br>11.00 (0.1; 19.0)    | 18<br>-0.50 (-42.0; 9.4)   | 19<br>0.20 (-20.0; 8.9)    |
| Lipase (U/L)                            | n | 6<br>1.50 (-34.3; 28.0)   | 18<br>7.14 (-19.0; 41.0)   | 17<br>0.00 (-15.7; 17.9)   |
| HDL cholesterol (mmol/L)                | n | 7<br>-0.181 (-0.65; 0.04) | 18<br>-0.223 (-0.60; 0.18) | 19<br>-0.034 (-1.13; 0.54) |
| LDL cholesterol (mmol/L)                | n | 7<br>0.329 (-0.68; 1.94)  | 18<br>0.167 (-0.15; 2.01)  | 19<br>-0.018 (-1.56; 0.99) |
| Bilirubin (μmol/L)                      | n | 7<br>0.68 (-2.7; 9.1)     | 18<br>-0.17 (-4.0; 4.1)    | 19<br>1.03 (-9.6; 5.6)     |

**Supplementary Table 4:** Changes from baseline at week 12 in ESR, DAS28-CRP, DAS28-ESR, SDAI, CDAI, HAQ-DI and FACIT-Fatigue (PP Set)

|           |           | ABX464 100 mg<br>(N=18) | ABX464 50 mg<br>(N=20) | Placebo<br>(N=20) |
|-----------|-----------|-------------------------|------------------------|-------------------|
| ESR       | N         | 7 (38.9%)               | 15 (75.0%)             | 18 (90.0%)        |
|           | Mean (SD) | -0.9 (11.7)             | -3.5 (23.0)            | -3.0 (17.5)       |
|           | 95% CI    | -12 to 10               | -16 to 9               | -12 to 6          |
|           | Min – Max | -22 to 18               | -37 to 49              | -38 to 41         |
|           | p-value*  | 0.769                   | 0.940                  |                   |
| DAS28-CRP | N         | 7 (38.9%)               | 16 (80.0%)             | 19 (95.0%)        |
|           | Mean (SD) | -1.94 (1.03)            | -1.79 (-1.44)          | -0.63 (0.99)      |
|           | 95% CI    | -2.9 to -1.0            | -2.6 to -1.0           | -1.1 to -0.1      |
|           | Min – Max | -3.3 to -0.4            | -4.8 to 0.1            | -3.3 to 0.6       |
|           | p-value*  | 0.006                   | <b>0.008</b>           |                   |
| DAS28-ESR | N         | 7 (38.9%)               | 14 (70.0%)             | 18 (90.0%)        |
|           | Mean (SD) | -2.0 (0.8)              | -1.8 (1.4)             | -0.6 (1.0)        |
|           | 95% CI    | -2.8 to -1.2            | -2.7 to -1.0           | -1.2 to -0.1      |
|           | Min – Max | -3.1 to -0.9            | -4.5 to -0.2           | -3.5 to 0.6       |
|           | p-value*  | <b>0.006</b>            | <b>0.010</b>           |                   |
| SDAI      | N         | 7 (38.9%)               | 16 (80.0%)             | 19 (95.0%)        |
|           | Mean (SD) | -25.4 (12.2)            | -22.6 (35.1)           | -7.9 (23.2)       |
|           | 95% CI    | -36.7 to -14.2          | -41.4 to -3.9          | -19.2 to 3.2      |
|           | Min – Max | -39.5 to -7.0           | -85.2 to 62.7          | -44.5 to 63.1     |
|           | p-value*  | 0.072                   | 0.149                  |                   |
| CDAI      | N         | 7 (38.9%)               | 16 (80.0%)             | 19 (95.0%)        |
|           | Mean (SD) | -27.1 (14.5)            | -20.2 (12.0)           | -7.3 (10.2)       |
|           | 95% CI    | -40.6 to -13.7          | -26.6 to -13.8         | -12.2 to -2.3     |
|           | Min – Max | -51.1 to -9.4           | -48.0 to -3.5          | -26.0 to 9.0      |
|           | p-value*  | <b>0.0007</b>           | <b>0.001</b>           |                   |
| SJC       | N         | 7 (38.9%)               | 16 (80.0%)             | 19 (95.0%)        |
|           | Mean (SD) | -8.6 (5.4)              | -5.8 (4.0)             | -2.2 (4.3)        |
|           | 95% CI    | -14.0 to -4.0           | -8.0 to -4.0           | -4.0 to -0.0      |
|           | Min – Max | -18.0 to -3.0           | -12.0 to 1.0           | -12.0 to 5.0      |
|           | p-value*  | <b>0.004</b>            | <b>0.017</b>           |                   |
| TJC       | N         | 7 (38.9%)               | 16 (80.0%)             | 19 (95.0%)        |
|           | Mean (SD) | -11.0 (6.5)             | -8.6 (6.2)             | -3.0 (3.8)        |
|           | 95% CI    | -17.0 to -5.0           | -12.0 to -5.0          | -5.0 to -1.0      |
|           | Min – Max | -24.0 to -3.0           | -24.0 to -1.0          | -11.0 to 4.0      |
|           | p-value*  | <b>0.0007</b>           | <b>0.002</b>           |                   |
| CRP       | N         | 7 (38.9%)               | 17 (85.0%)             | 19 (95.0%)        |
|           | Mean (SD) | 1.6 (8.3)               | -2.2 (29.8)            | -0.6 (19.2)       |
|           | 95% CI    | -6.0 to 9.4             | -17.6 to 13.1          | -10.0 to 8.6      |
|           | Min – Max | -8.8 to 13.4            | -54.9 to 87.5          | -36.3 to 65.5     |
|           | p-value*  | 0.757                   | 0.848                  |                   |
| Pain-VAS  | N         | 7 (38.9%)               | 17 (85.0%)             | 19 (95.0%)        |
|           | Mean (SD) | -2.4 (2.7)              | -3.0 (2.4)             | -0.8 (2.4)        |
|           | 95% CI    | -4.9 to 0.1             | -4.3 to -1.8           | -2.0 to 0.3       |

|                      |           |               |                |               |
|----------------------|-----------|---------------|----------------|---------------|
|                      | Min – Max | -8.2 to -0.6  | -7.3 to -0.1   | -7.0 to 3.6   |
|                      | p-value*  | 0.159         | <b>0.008</b>   |               |
| <b>HAQ-DI</b>        | N         | 7 (38.9)      | 17 (85.0%)     | 19 (95.0%)    |
|                      | Mean (SD) | -0.28 (0.54)  | -0.50 (0.66)   | -0.19 (0.49)  |
|                      | 95% CI    | -0.78 to 0.21 | -0.84 to -0.16 | -0.42 to 0.04 |
|                      | Min – Max | -1.37 to 0.37 | -1.75 to 0.62  | -1.75 to 0.87 |
|                      | p-value*  | 0.675         | 0.110          |               |
| <b>FACIT-Fatigue</b> | N         | 7 (38.9%)     | 17 (85.0%)     | 19 (95.0%)    |
|                      | Mean (SD) | 7.9 (11.0)    | 7.5 (6.0)      | 3.2 (6.4)     |
|                      | 95% CI    | -2 to 18      | 4 to 11        | 0 to 6        |
|                      | Min – Max | -4 to 26      | 0 to 20        | -11 to 15     |
|                      | p-value*  | 0.191         | <b>0.045</b>   |               |

CDAI = clinical disease activity score; CI = confidence interval; CRP = C-reactive protein; DAS =disease activity score; ESR = erythrocyte sedimentation rate; FACIT = functional assessment of chronic illness therapy; max = maximum; min = minimum; SD = standard deviation; HAQ-DI: Healthy Assessment Questionnaire - Disability Index; SDAI = simplified disease activity score.

\*: Analysis of Covariance, ABX-464 vs placebo; Mixed model Analysis of Covariance is conducted for the changes from baseline for each parameter.

Supplementary Table 5: Patients' responses and remissions at week 12 (PP Set)

|                                |          | ABX464 100 mg<br>(N=18) | ABX464 50 mg<br>(N=20) | Placebo<br>(N=20) |
|--------------------------------|----------|-------------------------|------------------------|-------------------|
| ACR/EULAR Boolean Remission    | N        | 7                       | 16                     | 19                |
|                                | Yes      | 0                       | 1 (6.3%)               | 0                 |
|                                | 95% CI   | 59.0 to 100.0           | 0.2 to 30.2            | 82.4 to 100.0     |
|                                | p-value* | NC                      | 0.2058                 |                   |
| ACR20 Response                 | N        | 7                       | 16                     | 19                |
|                                | Yes      | 3 (42.9%)               | 9 (56.3%)              | 4 (21.1%)         |
|                                | 95% CI   | 9.9 to 81.6             | 29.9 to 80.2           | 6.1 to 45.6       |
|                                | p-value* | 0.2790                  | <b>0.0303</b>          |                   |
| ACR50 Response                 | N        | 7                       | 16                     | 19                |
|                                | Yes      | 2 (28.6%)               | 5 (31.3%)              | 1 (5.3%)          |
|                                | 95% CI   | 3.7 to 71.0             | 11.0 to 58.7           | 0.1 to 26.0       |
|                                | p-value* | 0.122                   | <b>0.036</b>           |                   |
| ACR70 Response                 | N        | 7                       | 16                     | 19                |
|                                | Yes      | 1 (14.3%)               | 4 (25.0%)              | 1 (5.3%)          |
|                                | 95% CI   | 0.4 to 57.9             | 7.3 to 52.4            | 0.1 to 26.0       |
|                                | p-value* | 0.468                   | 0.089                  |                   |
| Categorical DAS28-CRP Response | N        | 7                       | 16                     | 19                |
|                                | Yes      | 6 (85.7%)               | 14 (87.5%)             | 8 (42.1%)         |
|                                | 95% CI   | 42.1 to 99.6            | 61.7 to 98.4           | 20.3 to 66.5      |
|                                | p-value* | <b>0.038</b>            | <b>0.004</b>           |                   |
| DAS28-ESR Remission            | N        | 7                       | 14                     | 18                |
|                                | Yes      | 0                       | 2 (14.3%)              | 0                 |
|                                | 95% CI   | 59.0 to 100.0           | 1.8 to 42.8            | 81.5 to 100.0     |
|                                | p-value* | NC                      | 0.062                  |                   |
| Low Disease Activity (LDA)     | N        | 7                       | 14                     | 18                |
|                                | Yes      | 2 (28.6%)               | 3 (21.4%)              | 2 (11.1%)         |
|                                | 95% CI   | 3.7 to 71.0             | 4.7 to 50.8            | 1.4 to 34.7       |
|                                | p-value* | 0.305                   | 0.426                  |                   |
| SDAI Remission                 | N        | 7                       | 16                     | 19                |
|                                | Yes      | 0                       | 1 (6.3%)               | 0                 |
|                                | 95% CI   | 59.0 to 100.0           | 0.2 to 30.2            | 82.4 to 100.0     |
|                                | p-value* | NC                      | 0.205                  |                   |
| CDAI Remission                 | N        | 7                       | 16                     | 19                |
|                                | Yes      | 0                       | 3 (18.8%)              | 0                 |
|                                | 95% CI   | 59.0 to 100.0           | 4.0 to 45.6            | 82.4 to 100.0     |
|                                | p-value* | NC                      | <b>0.024</b>           |                   |

ACR = American College of Rheumatology; CDAI = clinical disease activity score; CI = confidence interval; DAS = disease activity score; ESR = erythrocyte sedimentation rate; EULAR = European League Against Rheumatism; LDA = low disease activity; SDAI = simplified disease activity score. \*: Chi-squared test ABX-464 vs. placebo. NC - No statistics from Chi Square test produced because response has fewer than 2 non missing levels.

**Supplementary Table 6:** ACR20, ACR50, and ACR70 response rates at week 12 in subsets of patients exposed or not to anti-TNF $\alpha$  (ITT Set)

|                       |       | ABX464<br>100 mg<br>(N=19) | ABX464<br>50 mg<br>(N=21) | Placebo<br>(N=20) |
|-----------------------|-------|----------------------------|---------------------------|-------------------|
| <b>ACR20 Response</b> |       |                            |                           |                   |
| w/out anti-TNF exp.   | N     | 13                         | 15                        | 14                |
|                       | n (%) | 1 (7.7)                    | 7 (46.5)                  | 3 (21.4)          |
| with anti-TNF exp     | N     | 6                          | 6                         | 6                 |
|                       | n (%) | 2 (33.3)                   | 2 (33.3)                  | 1 (16.7)          |
| <b>ACR50 Response</b> |       |                            |                           |                   |
| w/out anti-TNF exp.   | N     | 13                         | 15                        | 14                |
|                       | n (%) | 1 (7.7)                    | 4 (26.7)                  | 1 (7.1)           |
| with anti-TNF exp     | N     | 6                          | 6                         | 6                 |
|                       | n (%) | 1 (16.7)                   | 1 (16.7)                  | 0 (0)             |
| <b>ACR70 Response</b> |       |                            |                           |                   |
| w/out anti-TNF exp.   | N     | 13                         | 15                        | 14                |
|                       | n (%) | 1 (7.7)                    | 3 (20)                    | 1 (7.1)           |
| with anti-TNF exp     | N     | 6                          | 6                         | 6                 |
|                       | n (%) | 0 (0)                      | 1 (16.7)                  | 0 (0)             |

**Supplementary Table 7:** Changes from baseline at week 12 in ESR, DAS28-CRP, DAS28-ESR, SDAI, CDAI and FACIT-Fatigue (Efficacy Set 2†)

|               |           | ABX464 100 mg<br>(N=19) | ABX464 50 mg<br>(N=21) | Placebo<br>(N=20) |
|---------------|-----------|-------------------------|------------------------|-------------------|
| ESR           | N         | 12                      | 19                     | 20                |
|               | Mean (SD) | -5.9 (16.7)             | 0.5 (23.2)             | -4.6 (18.1)       |
|               | 95% CI    | -17 to 5                | -11 to 12              | -13 to 4          |
|               | p-value*  | 0.832                   | 0.449                  |                   |
| DAS28-CRP     | N         | 12                      | 19                     | 20                |
|               | Mean (SD) | -1.5 (1.0)              | -1.6 (1.3)             | -0.6 (0.9)        |
|               | 95% CI    | -2.1 to -0.9            | -2.3 to -1.0           | -1.1 to -0.2      |
|               | p-value*  | 0.021                   | 0.009                  |                   |
| DAS28-ESR     | N         | 12                      | 19                     | 20                |
|               | Mean (SD) | -1.5 (0.9)              | -1.6 (1.3)             | -0.6 (0.9)        |
|               | 95% CI    | -2.1 to -0.9            | -2.3 to -1.0           | -1.1 to -0.2      |
|               | p-value*  | <b>0.019</b>            | 0.011                  |                   |
| SDAI          | N         | 12                      | 19                     | 20                |
|               | Mean (SD) | -30.7 (33.9)            | -23.0 (33.9)           | -8.2 (22.6)       |
|               | 95% CI    | -52.3 to -9.1           | -39.4 to -6.7          | -18.9 to 2.3      |
|               | p-value*  | <b>0.032</b>            | 0.116                  |                   |
| CDAI          | N         | 12                      | 19                     | 20                |
|               | Mean (SD) | -20.3 (14.4)            | -18.4 (11.8)           | -7.4 (10.0)       |
|               | 95% CI    | -29.5 to -11.1          | -24.1 to -12.7         | -12.1 to -2.7     |
|               | p-value*  | <b>0.005</b>            | <b>0.003</b>           |                   |
| FACIT-Fatigue | N         | 12                      | 19                     | 20                |
|               | Mean (SD) | 6.6 (9.2)               | 6.6 (6.5)              | 3.7 (6.6)         |
|               | 95% CI    | 1 to 12                 | 3 to 10                | 1 to 7            |

CDAI = clinical disease activity score; CI = confidence interval; CRP = C-reactive protein; DAS = disease activity score; ESR = erythrocyte sedimentation rate; FACIT = functional assessment of chronic illness therapy; max = maximum; min = minimum; SD = standard deviation; SDAI = simplified disease activity score.

\*: Analysis of Covariance, ABX-464 vs placebo; Mixed model Analysis of Covariance is conducted for the changes from baseline for each parameter.

†: The efficacy Set 2 used data imputation (last observation carried forward) from Week 4 onwards. If there were no efficacy data available, then the dropout was considered as treatment failure.



Supplementary Table 8: Patients' responses and remissions at week 12 (Efficacy Set 2<sup>†</sup>)

|                                |        | ABX464 100 mg<br>(N=19) | ABX464 50 mg<br>(N=21) | Placebo<br>(N=20) |
|--------------------------------|--------|-------------------------|------------------------|-------------------|
| ACR20 Response                 | N      | 12                      | 19                     | 20                |
|                                | Yes    | 33.3%                   | 47.4%                  | 20.0%             |
|                                | 95% CI | 9.9 to 65.1             | 24.4 to 71.1           | 5.7 to 43.7       |
| ACR50 Response                 | N      | 12                      | 19                     | 20                |
|                                | Yes    | 16.7%                   | 26.3%                  | 5.0%              |
|                                | 95% CI | 2.1 to 48.4             | 9.1 to 51.2            | 0.1 to 24.9       |
| ACR70 Response                 | N      | 12                      | 19                     | 20                |
|                                | Yes    | 8.3%                    | 21.1%                  | 5.0%              |
|                                | 95% CI | 0.2 to 38.5             | 6.1 to 45.6            | 0.1 to 24.9       |
| Categorical DAS28-CRP Response | N      | 12                      | 19                     | 20                |
|                                | Yes    | 66.7%                   | 84.2%                  | 45.0%             |
|                                | 95% CI | 34.9 to 90.1            | 60.4 to 96.6           | 23.1 to 68.5      |
| DAS28-ESR Remission            | N      | 12                      | 19                     | 20                |
|                                | Yes    | 0                       | 10.5%                  | 0                 |
|                                | 95% CI |                         | 1.3 to 33.1            |                   |
| Low Disease Activity           | N      | 12                      | 19                     | 20                |
|                                | Yes    | 16.7%                   | 21.1%                  | 10.0%             |
|                                | 95% CI | 2.1 to 48.4             | 6.1 to 45.6            | 1.2 to 31.7       |
| SDAI Remission                 | N      | 12                      | 19                     | 20                |
|                                | Yes    | 0                       | 5.3%                   | 0                 |
|                                | 95% CI |                         | 0.1 to 26.0            |                   |
| CDAI Remission                 | N      | 12                      | 19                     | 20                |
|                                | Yes    | 0                       | 15.8%                  | 0                 |
|                                | 95% CI |                         | 3.4 to 39.6            |                   |
| ACR/EULAR Remission            | N      | 12                      | 19                     | 20                |
|                                | Yes    | 0                       | 5.3%                   | 0                 |
|                                | 95% CI |                         | 0.1 to 26.0            |                   |

ACR = American College of Rheumatology; CDAI = clinical disease activity score; CI = confidence interval; DAS = disease activity score; ESR = erythrocyte sedimentation rate; EULAR = European League Against Rheumatism; SDAI = simplified disease activity score. \*: Chi-squared test ABX-464 vs. placebo. NC - No statistics from Chi Square test produced because response has fewer than 2 non missing levels.

†: The efficacy Set 2 used data imputation (last observation carried forward) from Week 4 onwards. If there were no efficacy data available, then the dropout was considered as treatment failure.

**Supplementary Table 9:** ABX464 PK parameters by day following administration of 50 mg and 100 mg of ABX464 once a day

ABX464 was rapidly absorbed in patients with RA with a C<sub>max</sub> observed approximately 2 to 3 hours after dosing, which is in the C<sub>max</sub> range measured in healthy volunteers, HIV and UC patients (1.5 to 2.9 hours). Median t<sub>max</sub> of ABX464 was 2.00 h after administration of ABX464 50 mg of and 2.50-3.00 h after administration of ABX464 100 mg, regardless of the day. Exposure to ABX464 was variable with an inter-individual variability for C<sub>max</sub> and AUC<sub>0-t</sub>, as expressed by CV%, between 73 and 137%. After repeated administrations of ABX464, an initial decrease in ABX464 AUC is observed and steady state is reached after 8 weeks of treatment. ABX464 is rapidly metabolized to ABX464-N-Glu which had a much longer half-life compared to ABX464 (about 100 hours, data not shown).

|     |      | ABX464 50 mg              |                             |                                 | ABX464 100 mg             |                             |                                 |
|-----|------|---------------------------|-----------------------------|---------------------------------|---------------------------|-----------------------------|---------------------------------|
| Day |      | t <sub>max</sub> *<br>(h) | C <sub>max</sub><br>(ng/mL) | AUC <sub>0-t</sub><br>(h*ng/mL) | t <sub>max</sub> *<br>(h) | C <sub>max</sub><br>(ng/mL) | AUC <sub>0-t</sub><br>(h*ng/mL) |
| 0   | N    | 20                        | 20                          | 20                              | 18                        | 18                          | 17                              |
|     | Mean | 2.00                      | 35.9                        | 53.05                           | 3.00                      | 69.0                        | 90.94                           |
|     | SD   | 0.57                      | 36.7                        | 55.34                           | 0.60                      | 72.7                        | 71.56                           |
|     | CV%  | 1.08-3.00                 | 102.2                       | 104.3                           | 1.00-3.00                 | 105.3                       | 78.7                            |
|     | GM   | 2.27                      | 18.7                        | 24.40                           | 2.50                      | 49.4                        | 71.46                           |
| 14  | N    | 20                        | 20                          | 19                              | 14                        | 14                          | 14                              |
|     | Mean | 2.00                      | 16.9                        | 28.49                           | 2.50                      | 19.4                        | 35.20                           |
|     | SD   | 0.73                      | 12.5                        | 21.41                           | 0.83                      | 20.7                        | 44.48                           |
|     | CV%  | 0.00-3.10                 | 73.9                        | 75.1                            | 1.00-3.00                 | 106.3                       | 126.4                           |
|     | GM   | NC                        | 11.9                        | 21.89                           | 2.10                      | 11.8                        | 17.97                           |
| 56  | N    | 17                        | 17                          | 17                              | 8                         | 8                           | 8                               |
|     | Mean | 2.00                      | 25.5                        | 37.51                           | 3.00                      | 34.9                        | 48.11                           |
|     | SD   | 0.75                      | 30.2                        | 51.32                           | 0.51                      | 25.5                        | 36.34                           |
|     | CV%  | 1.00-3.08                 | 118.4                       | 136.8                           | 2.00-3.00                 | 73.1                        | 75.5                            |
|     | GM   | 1.92                      | 12.5                        | 15.57                           | 2.58                      | 21.2                        | 26.99                           |

\* Median and Min-Max are presented instead of Mean and CV% ; NC: Not calculable since at least one value equal to zero

Concentrations in plasma samples were determined using protein precipitation followed by liquid chromatography coupled to a tandem mass spectrometry (LC/MS/MS) method with a limit of quantification (LOQ) of 0.500 ng/mL for ABX464.
