# Supplementary material for: Safety and efficacy of the miR-124 upregulator ABX464 (obefazimod, 50 and 100 mg per day) in patients with active rheumatoid arthritis and inadequate response to methotrexate and/or anti-TNFα therapy: a placebo-controlled phase II study
Source: PubMed Central journal article supplement — Ann Rheum Dis. 2022 May 31;81(8):1076–84. doi: 10.1136/annrheumdis-2022-222228 (PMC9279835; doi:10.1136/annrheumdis-2022-222228), 2022-05-31
Supplement: annrheumdis-2022-222228supp002.pdf [file annrheumdis-2022-222228supp002.pdf]

**Supplementary figure 1:** Occurrence of main AEs (headaches, nausea and vomiting, diarrhea) and dropout onset times for RA patients who received placebo or ABX464 (50 or 100 mg) once daily.

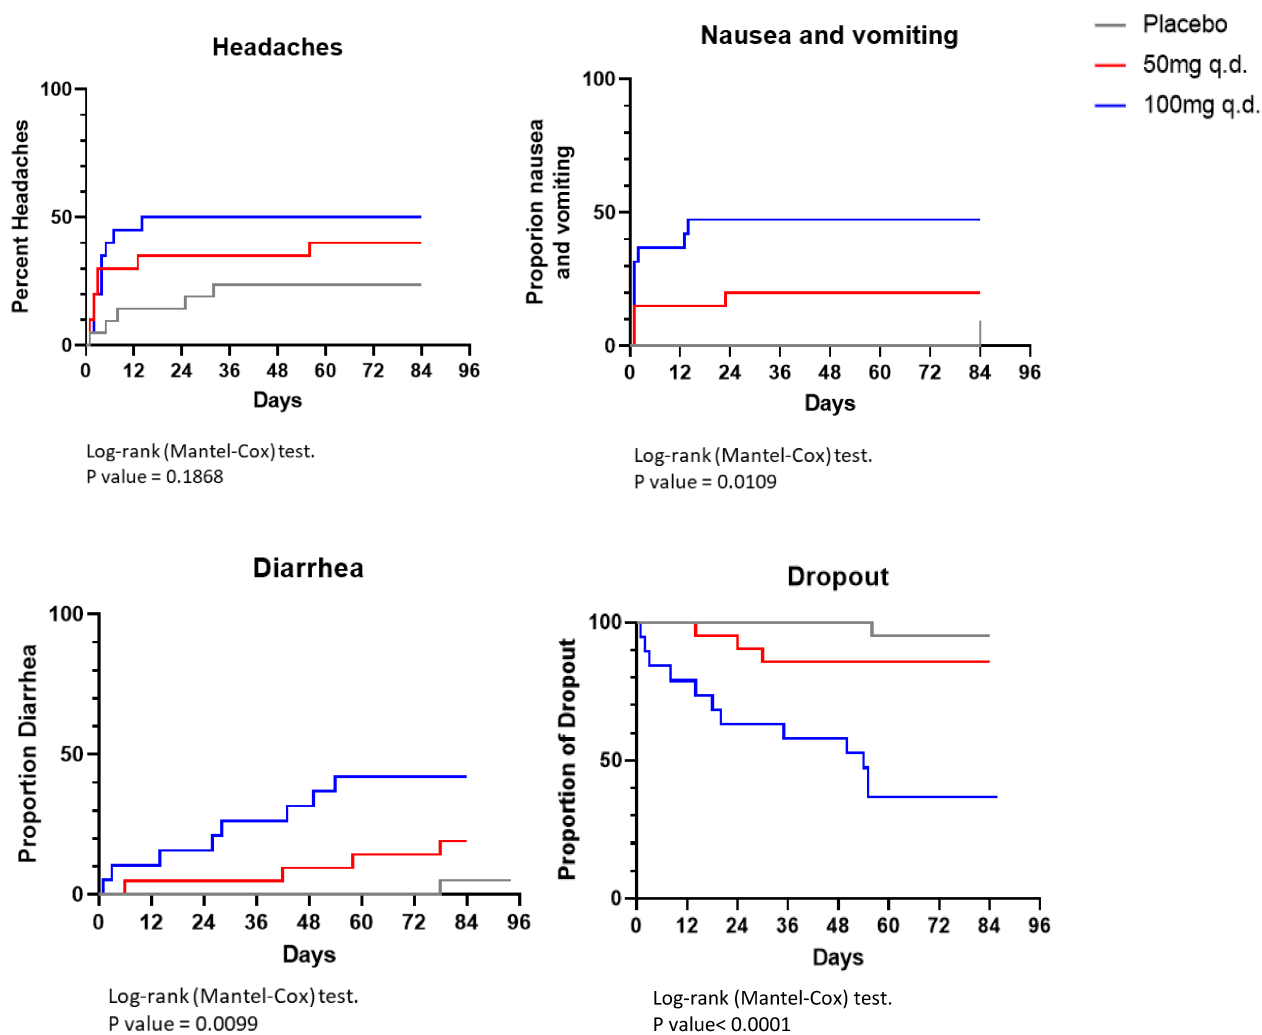

The mean delay for headaches occurrence was 2.0 days for ABX464 100 mg and 0.25 days for ABX464 50 mg ; for nausea/vomiting, it was 3.2 and 5.7 days for ABX464 100 mg and 50 mg, respectively ; for diarrhea it was 30.7 and 46.2 days for ABX464 100 mg and 50 mg, respectively. Most dropouts in the 100 mg group took place rapidly in the first 2 weeks of treatment.
